# Supplementary material
Source: PubMed Central journal article supplement (PMC6800251)

# A Balb/c *Rag1*<sup>-/-</sup>

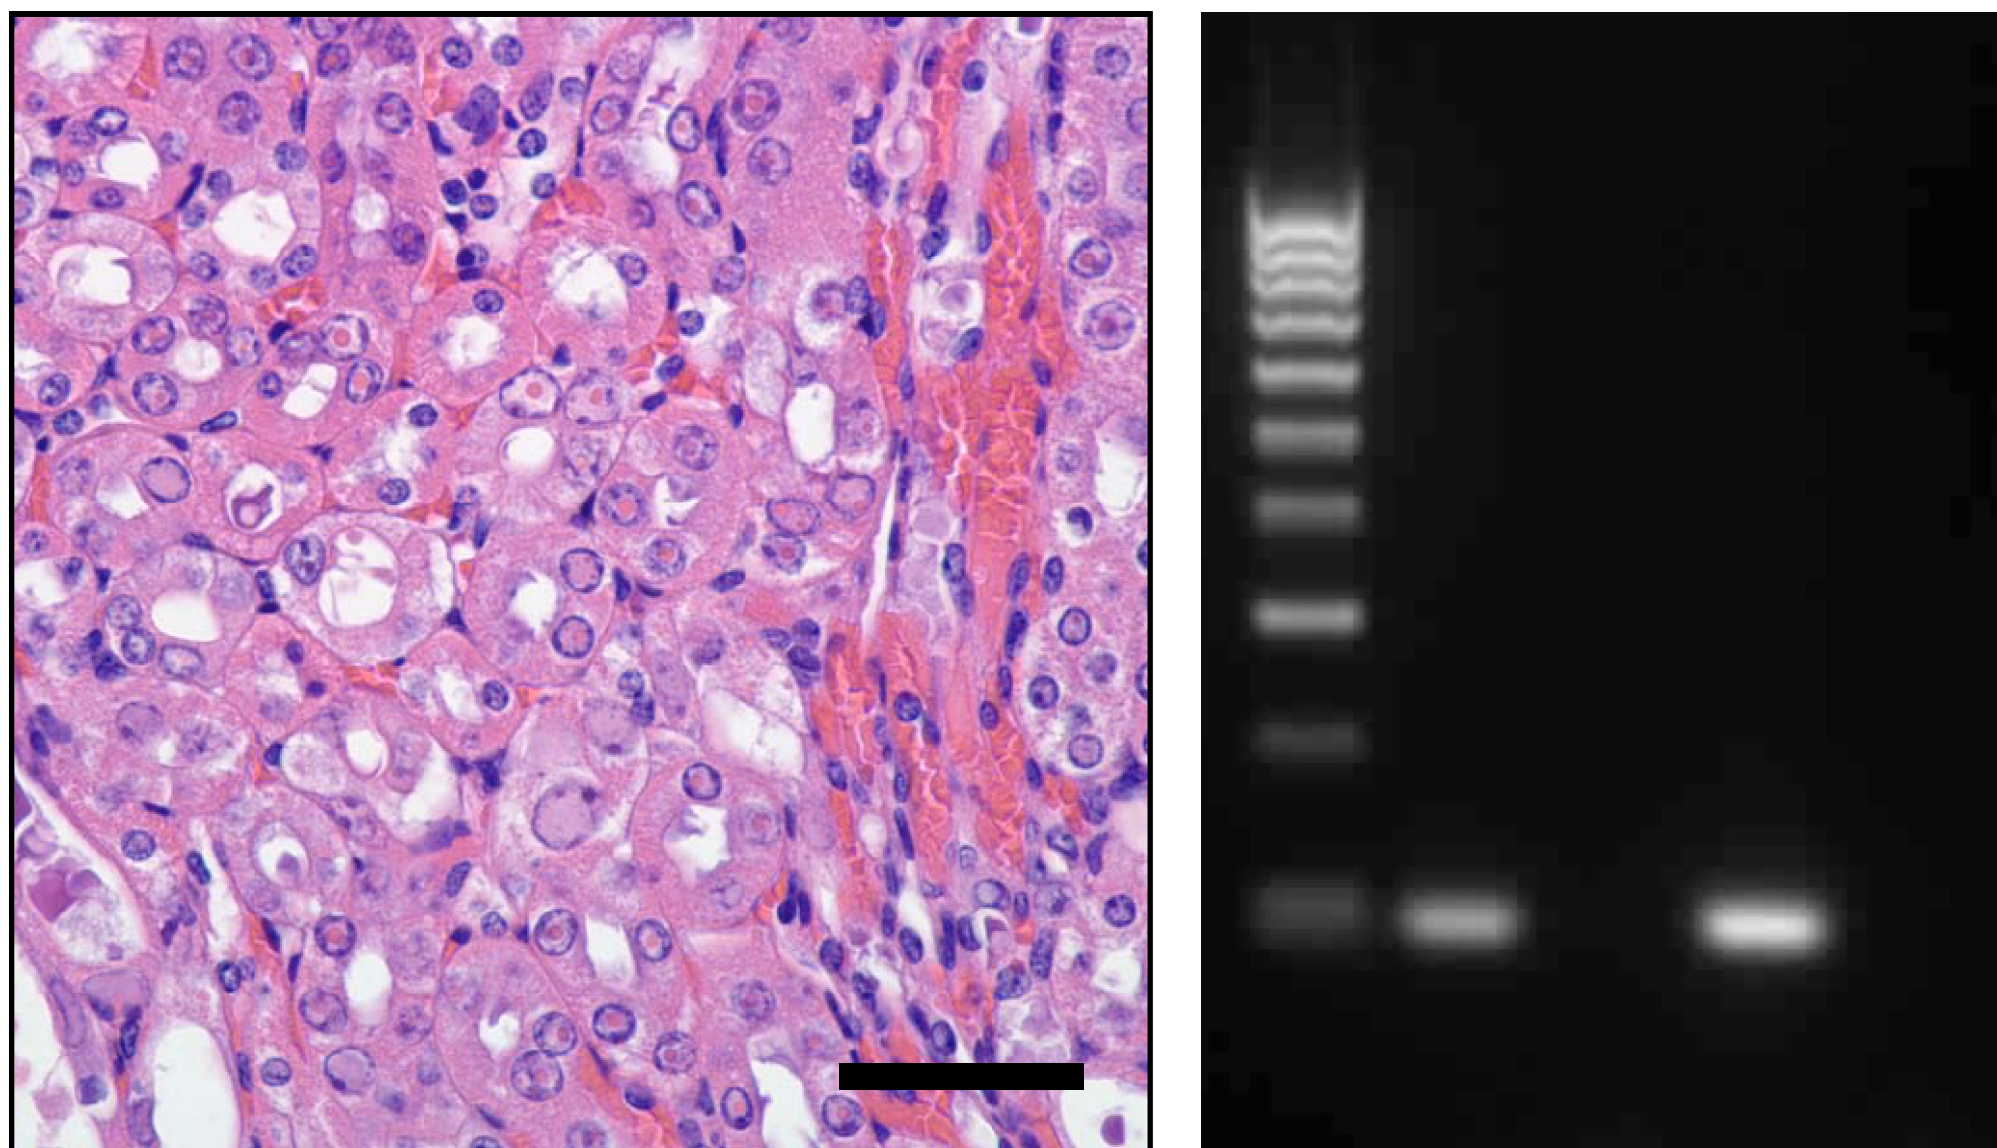

100bp ladder  
*Balb/c Rag1*<sup>-/-</sup>  
*Rag1*<sup>-/-</sup>  
*Cxcr6*<sup>gfp/gfp</sup> *Rag1*<sup>-/-</sup>  
 blank

# B C3.Cg-*Prkdc*<sup>scid</sup>

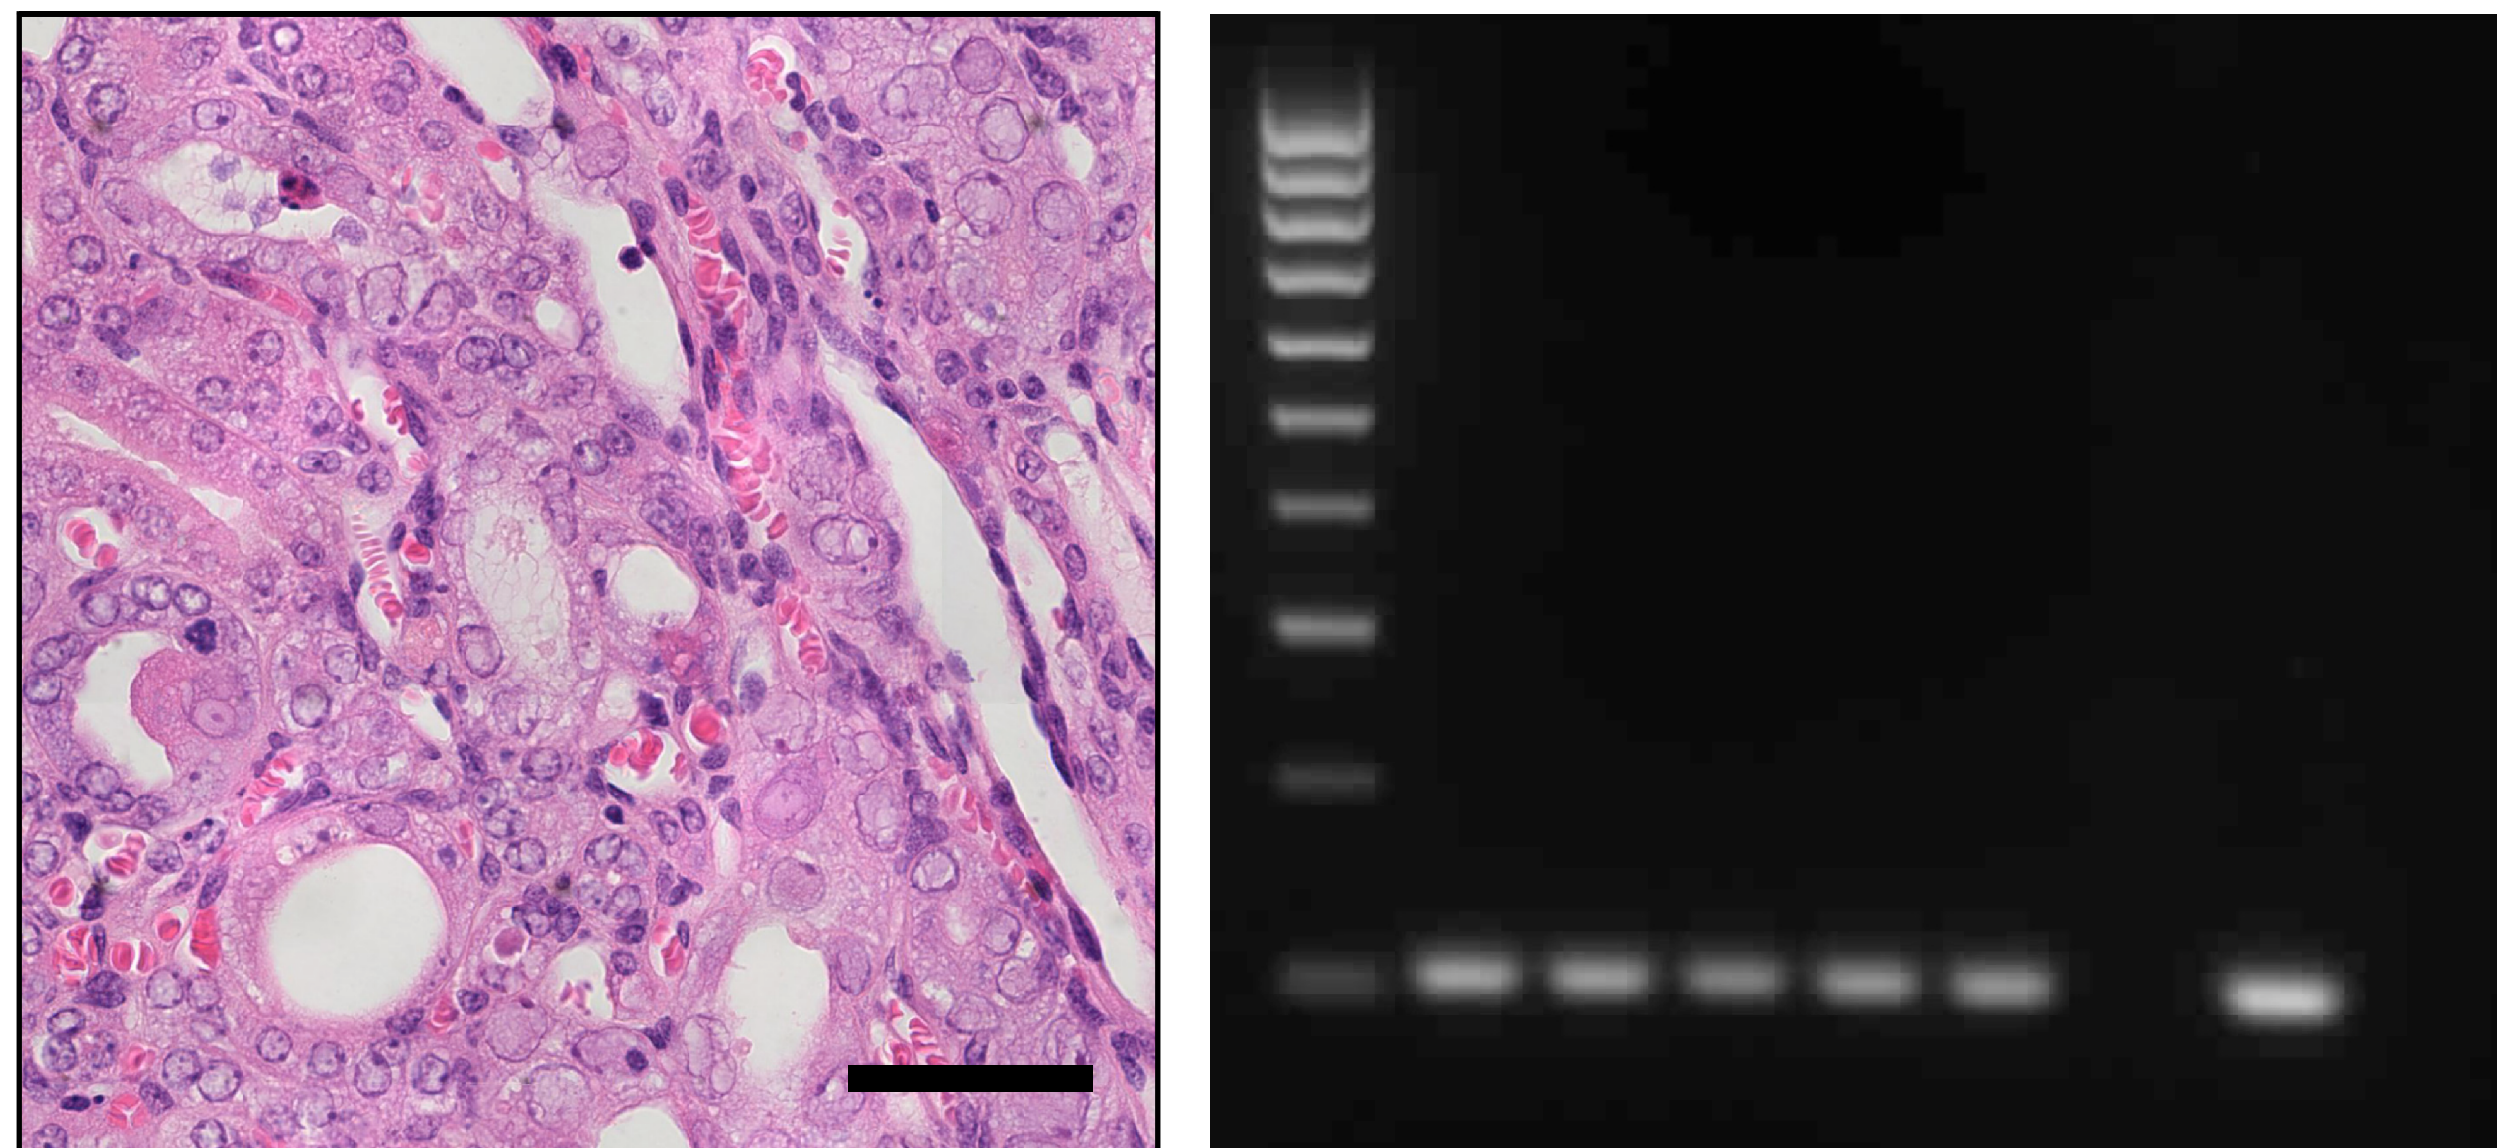

100bp ladder  
*C3.Cg-Prkdc*<sup>scid</sup> 1  
*C3.Cg-Prkdc*<sup>scid</sup> 2  
*C3.Cg-Prkdc*<sup>scid</sup> 3  
*C3.Cg-Prkdc*<sup>scid</sup> 4  
*C3.Cg-Prkdc*<sup>scid</sup> 5  
*Rag1*<sup>-/-</sup>  
*Cxcr6*<sup>gfp/gfp</sup> *Rag1*<sup>-/-</sup>  
 blank

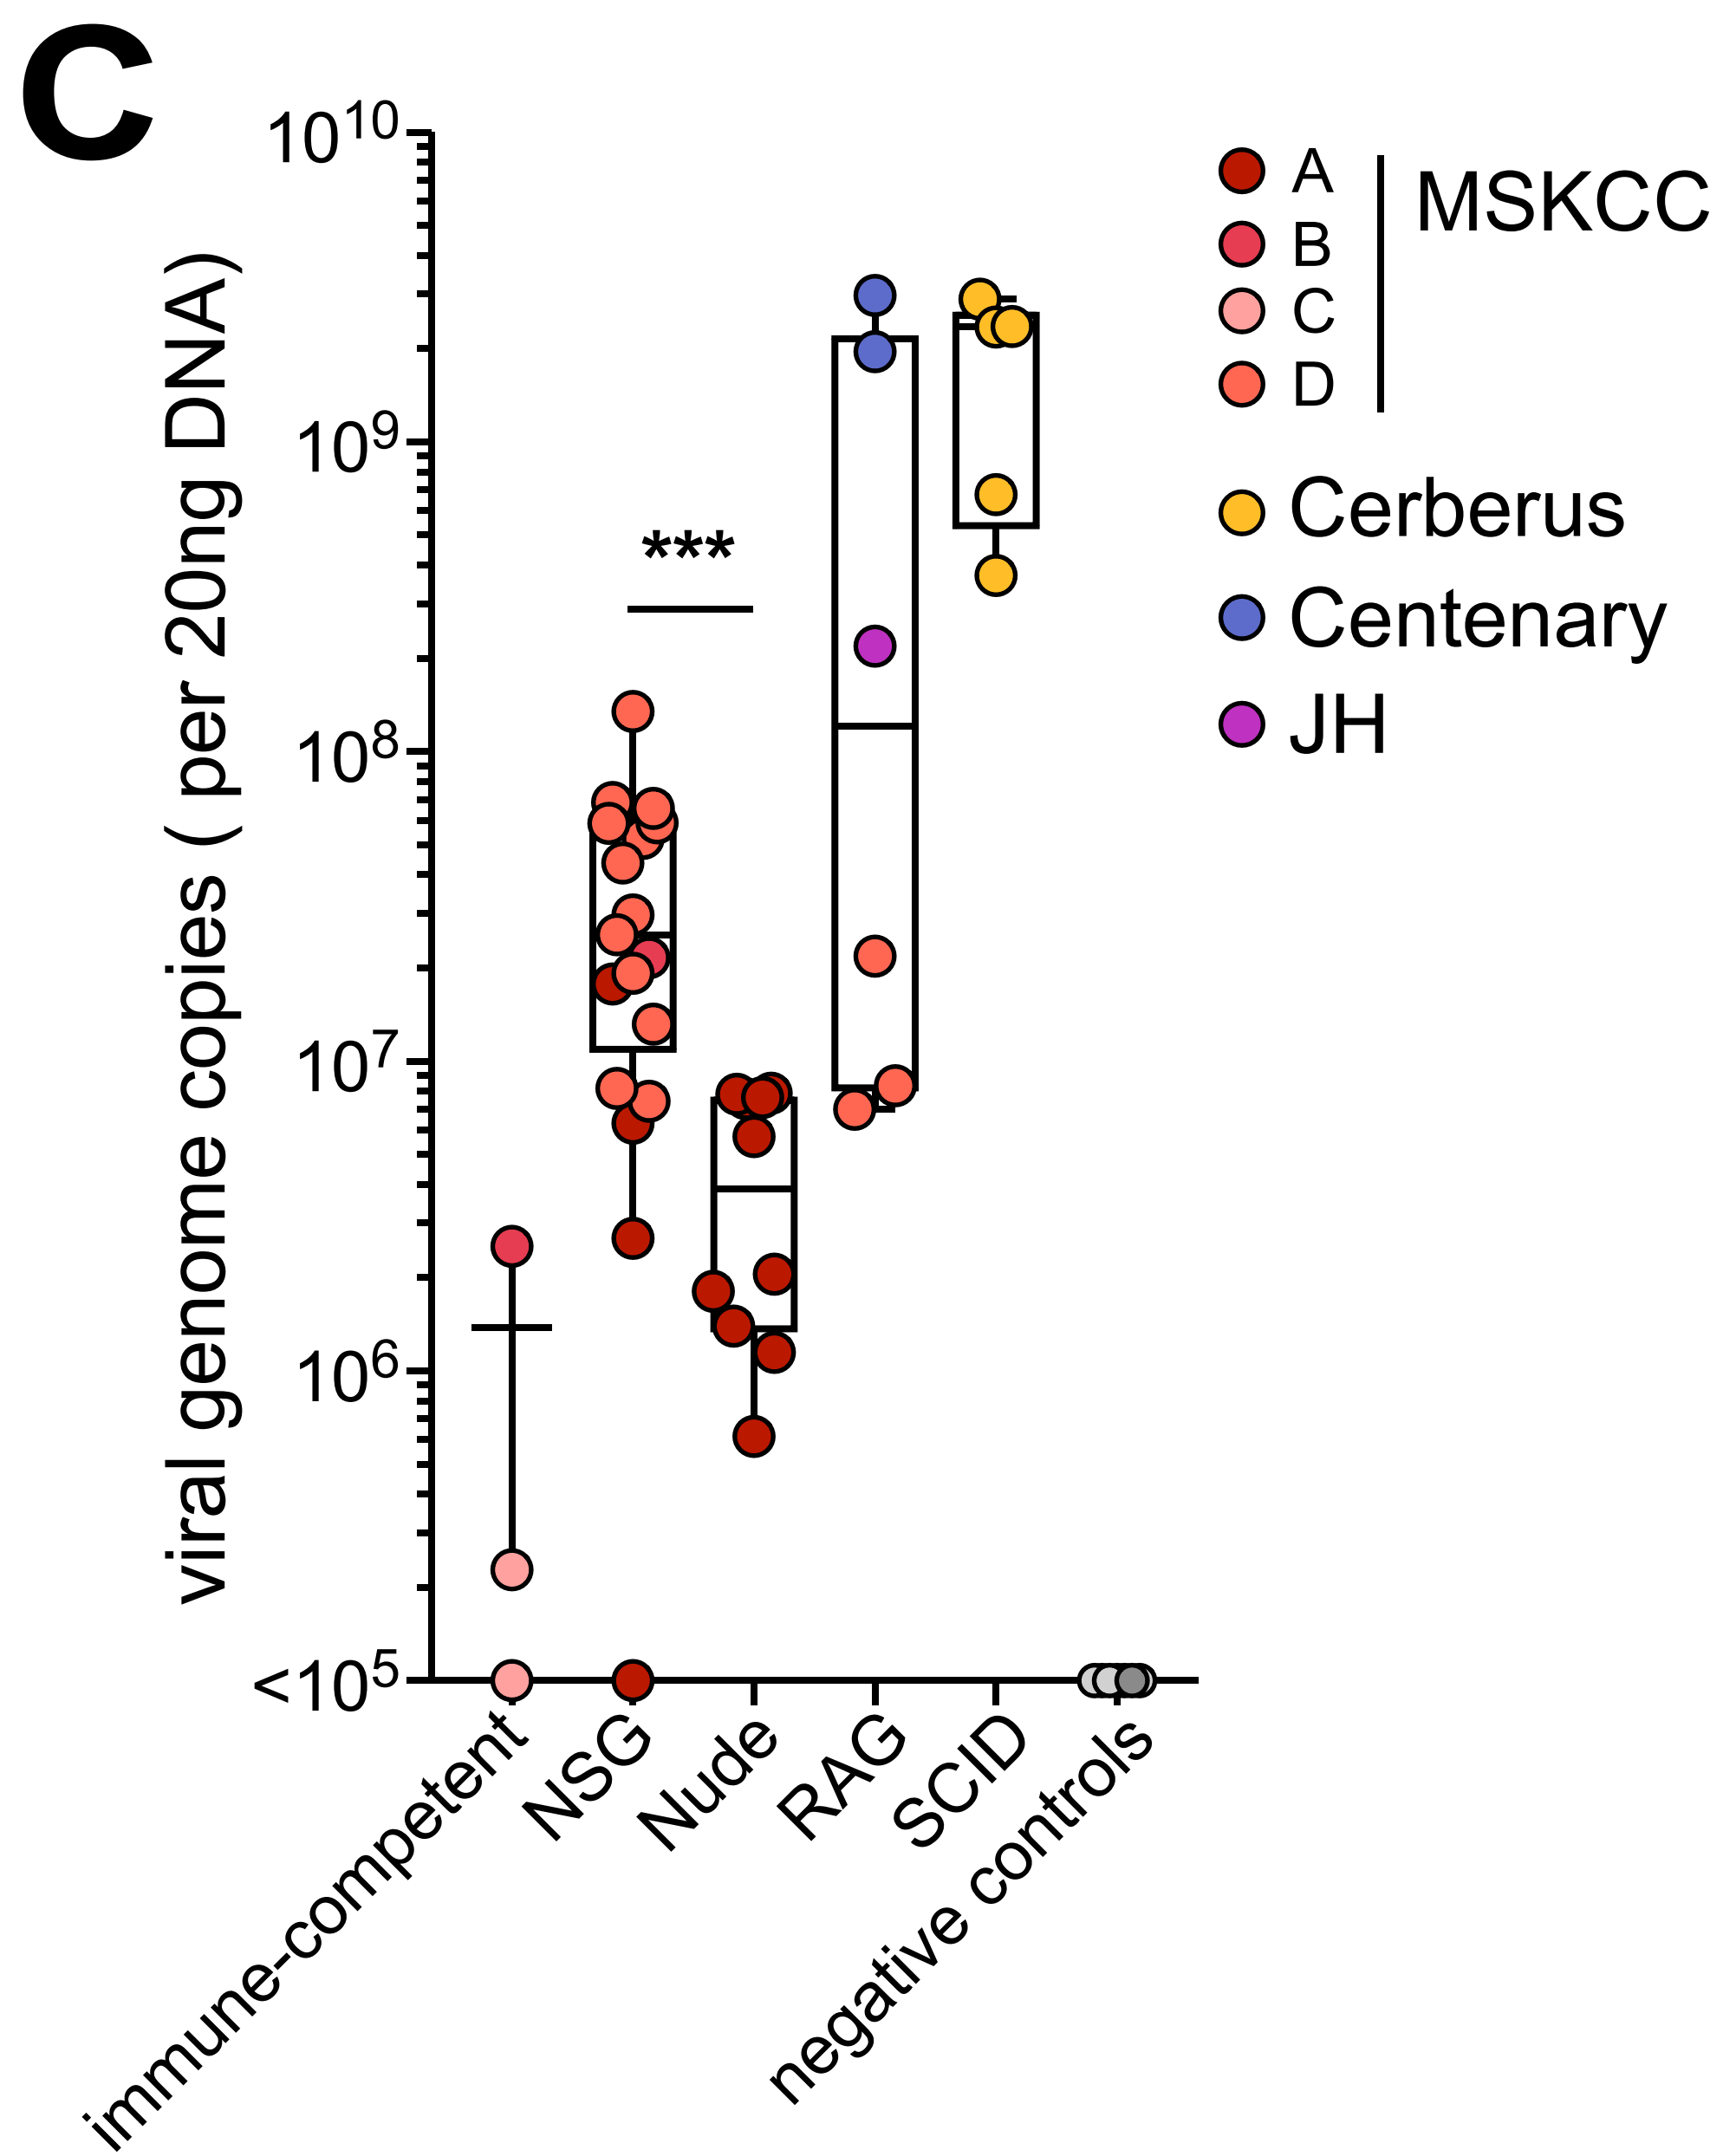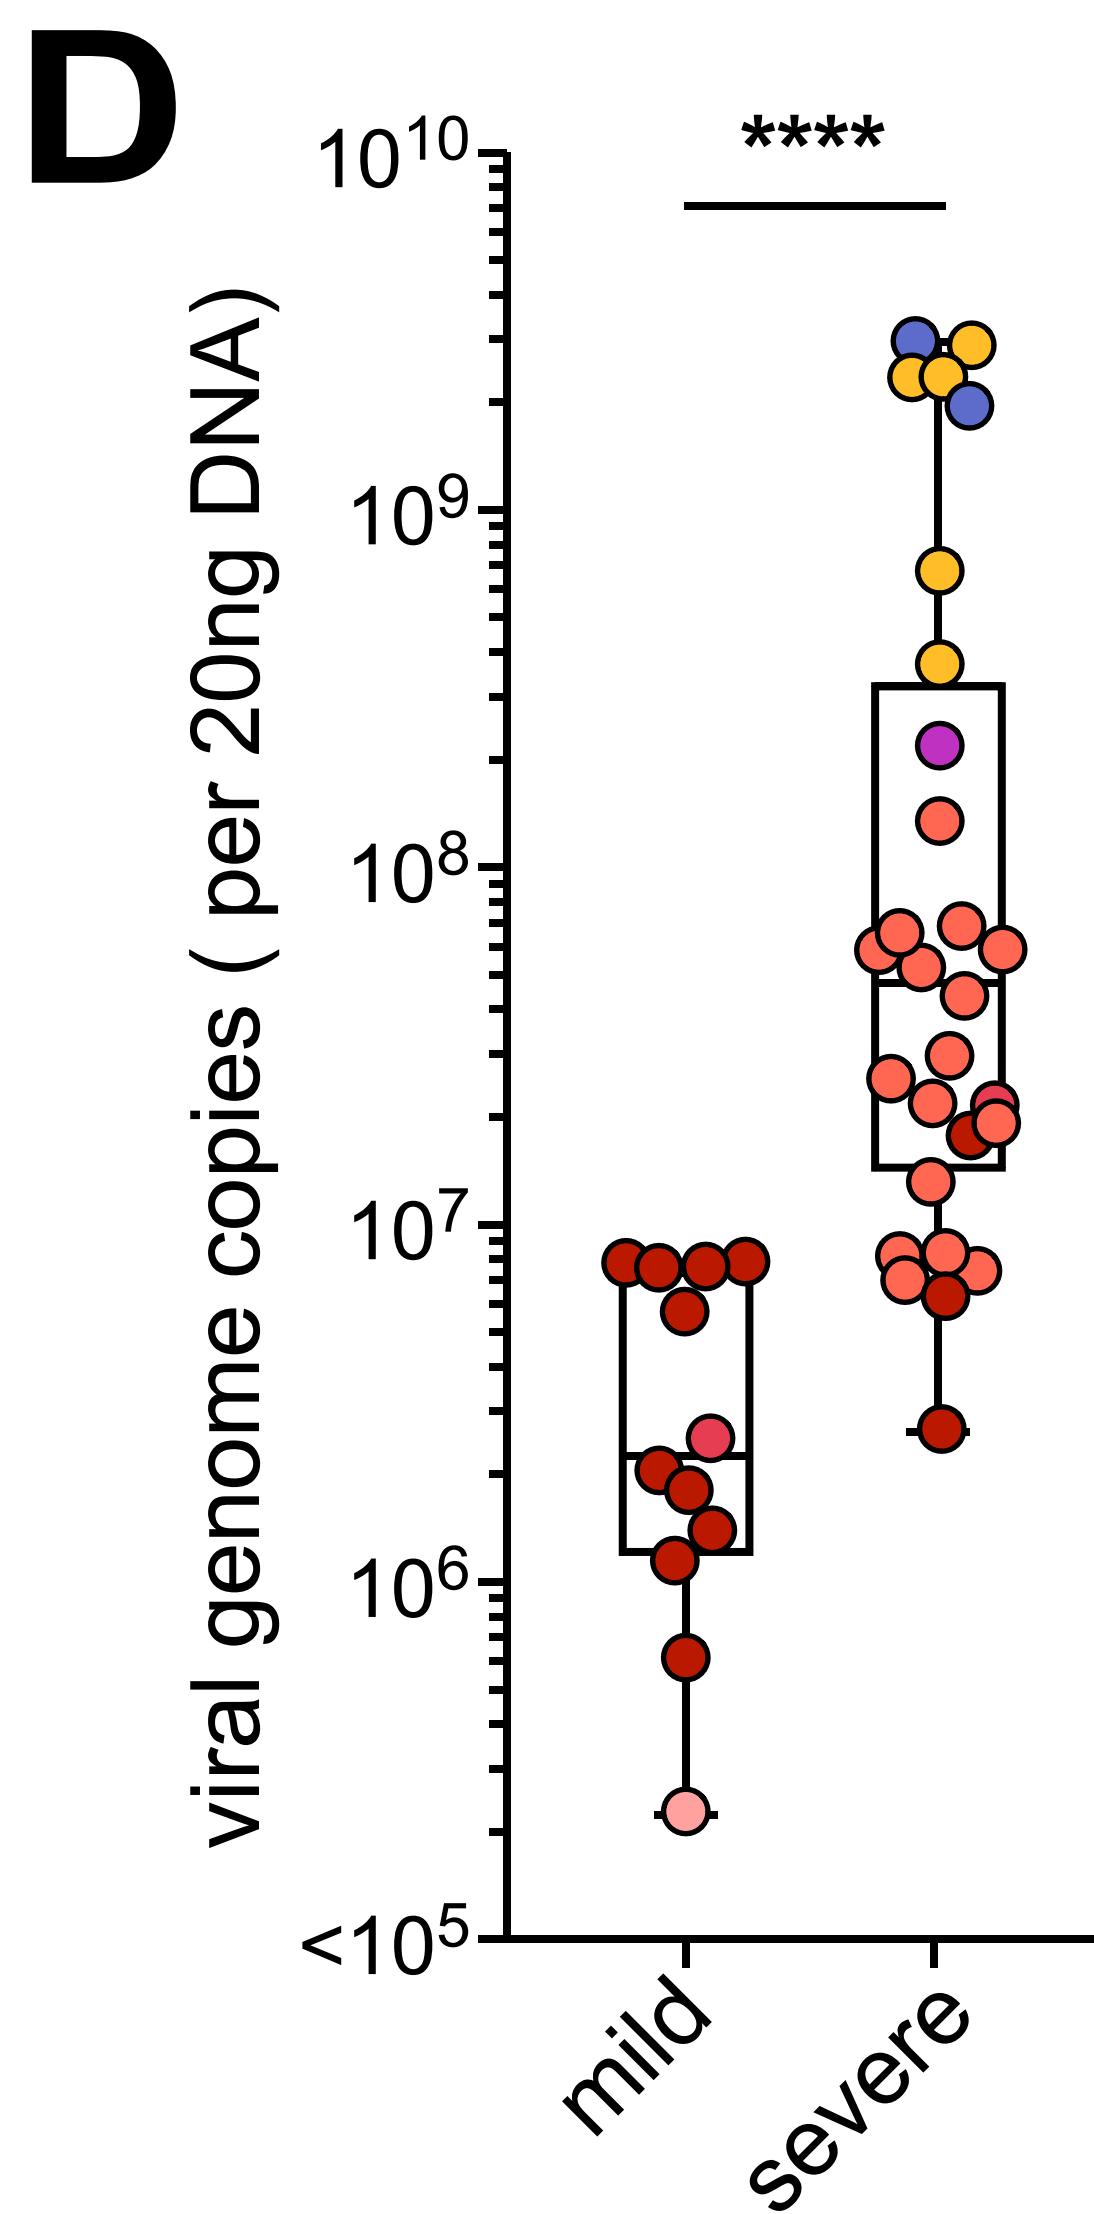

Supplement: NIHMS1506358-supplement-5.pdf [file NIHMS1506358-supplement-5.pdf]
