# Supplementary material
Source: PubMed Central journal article supplement (PMC6800251)

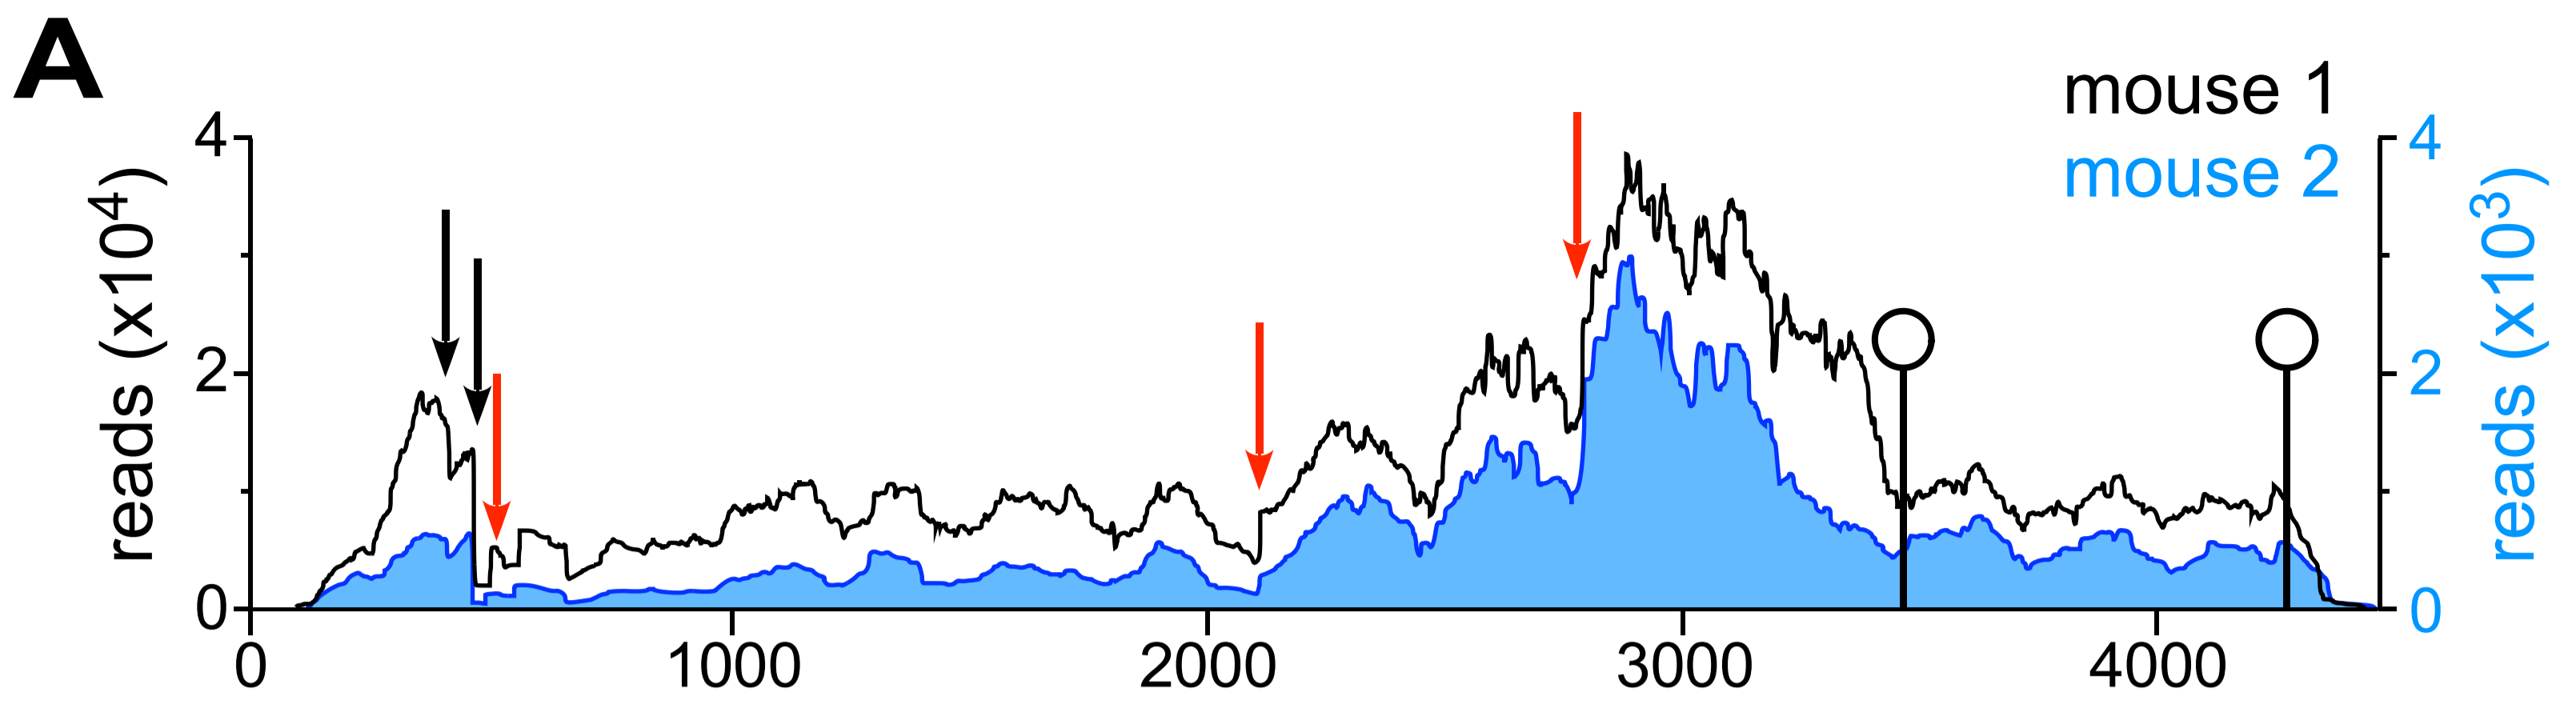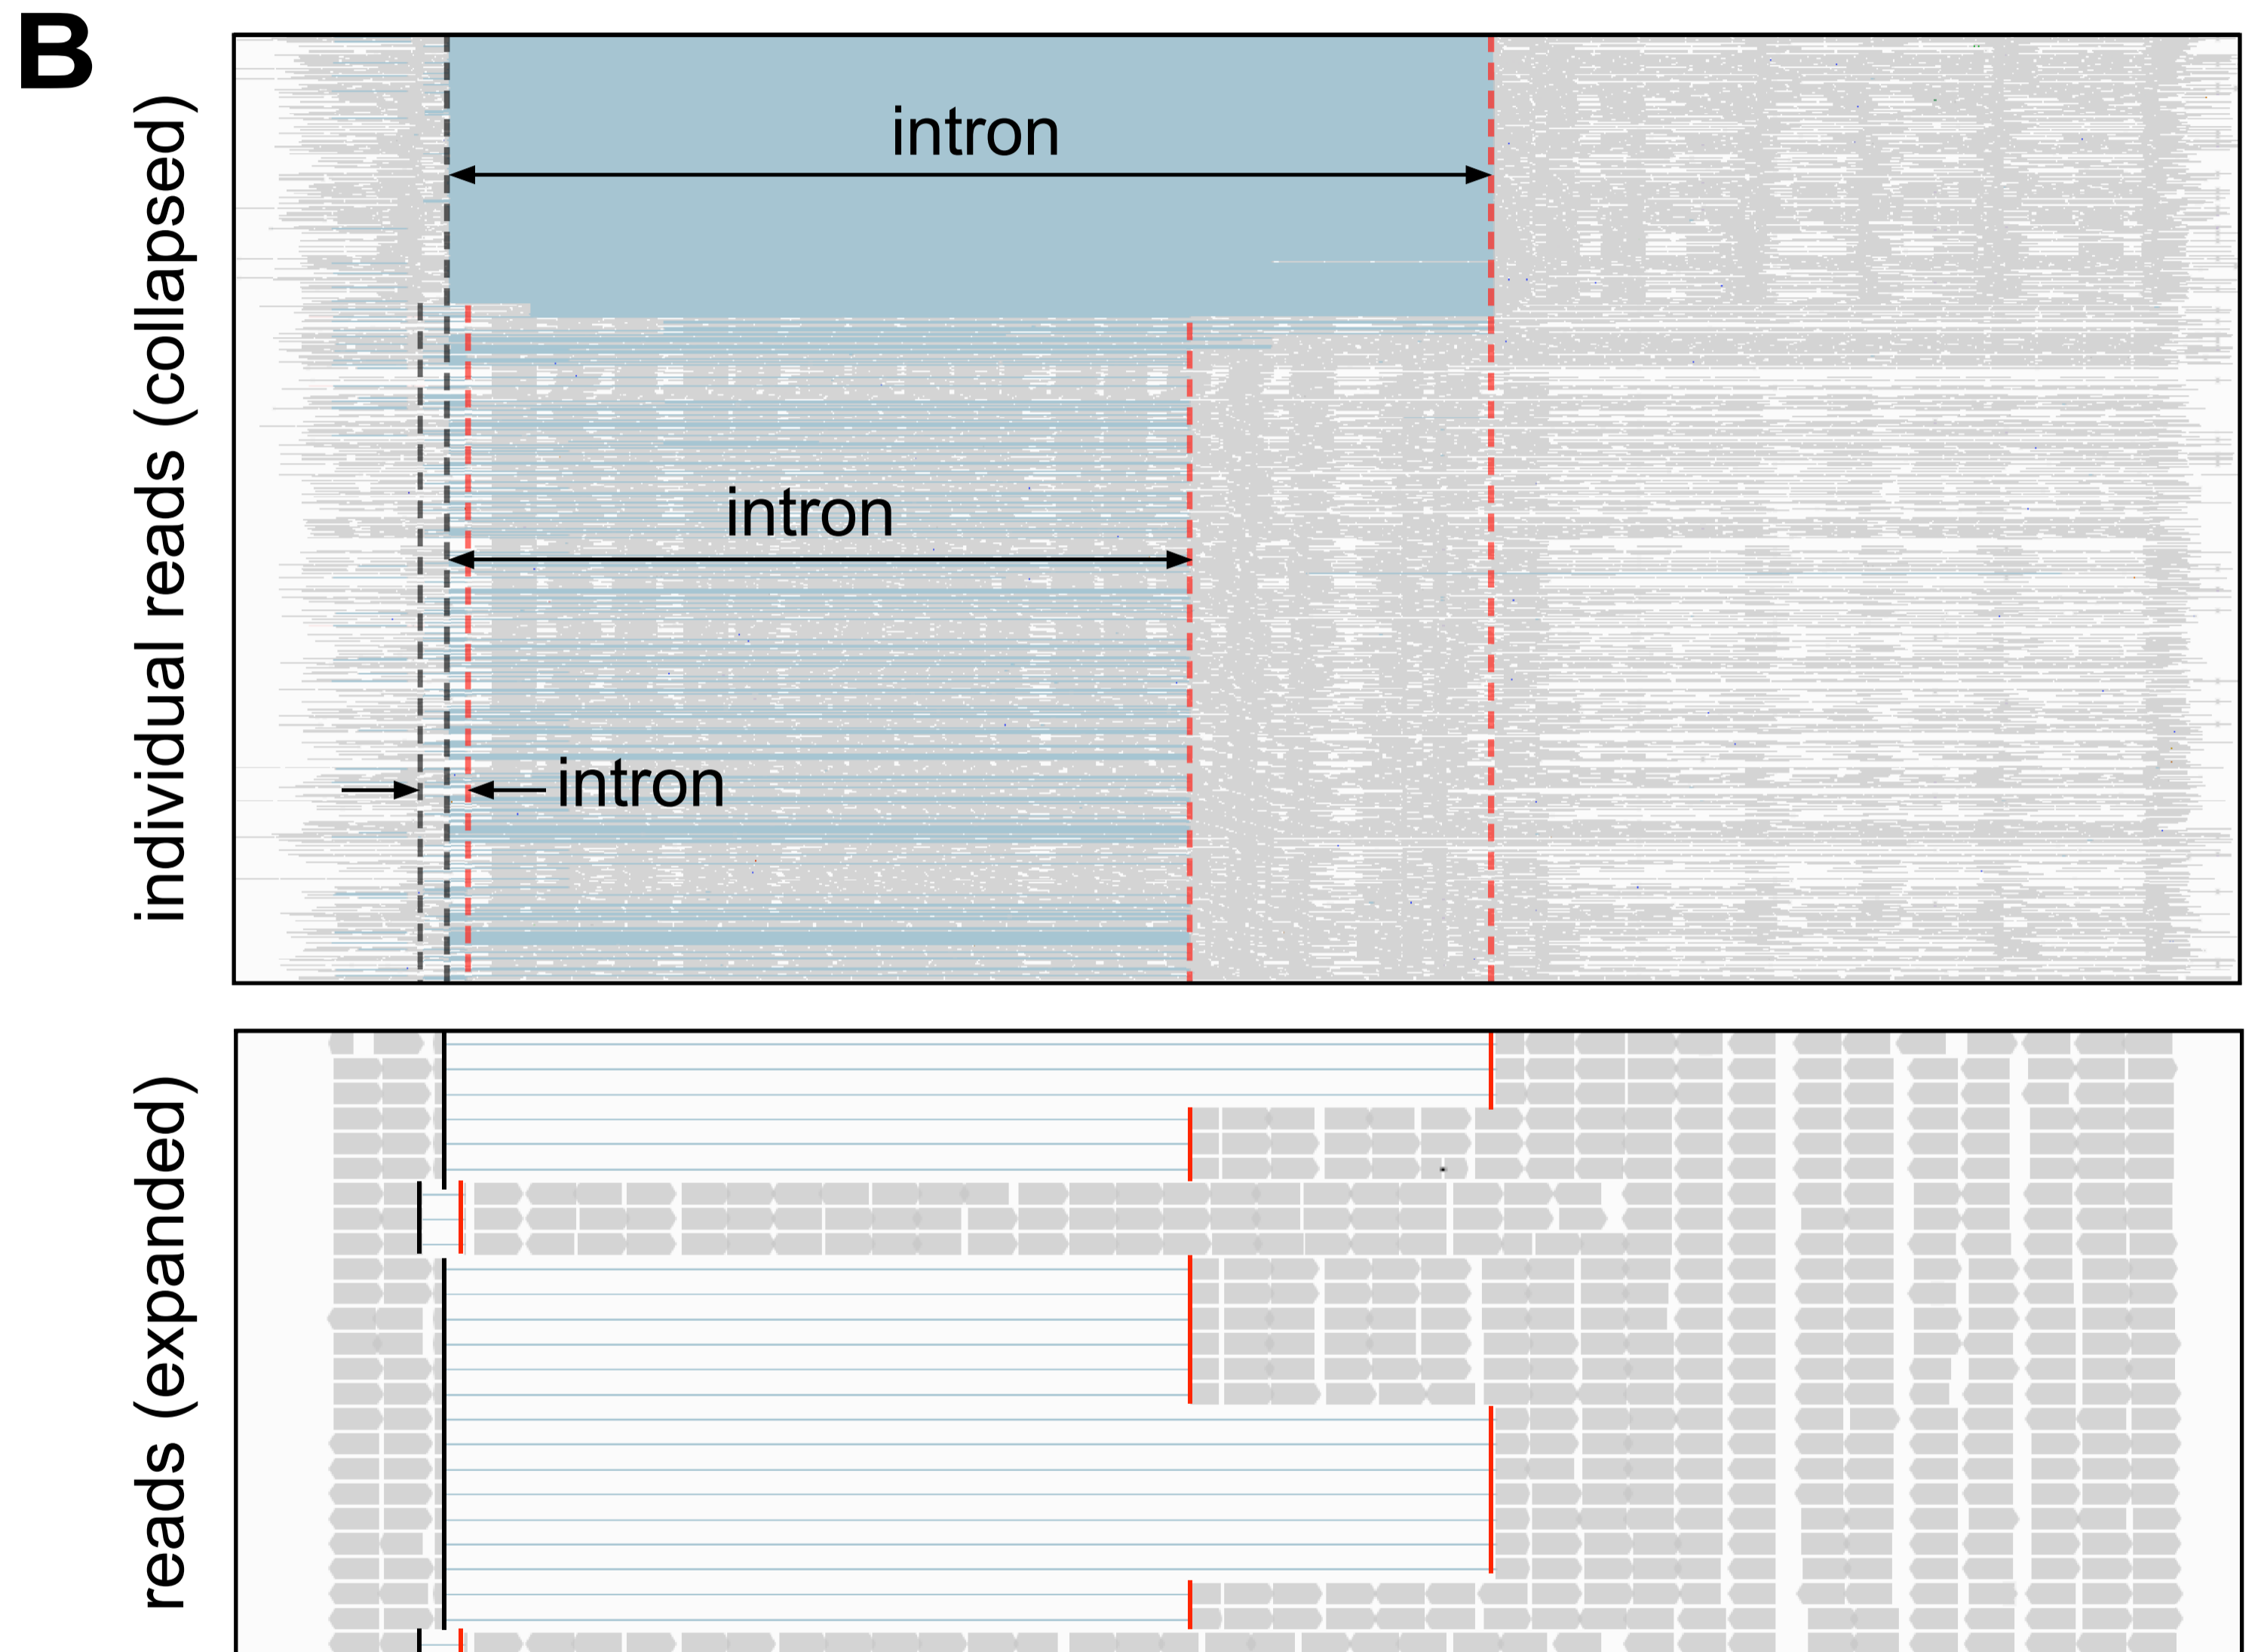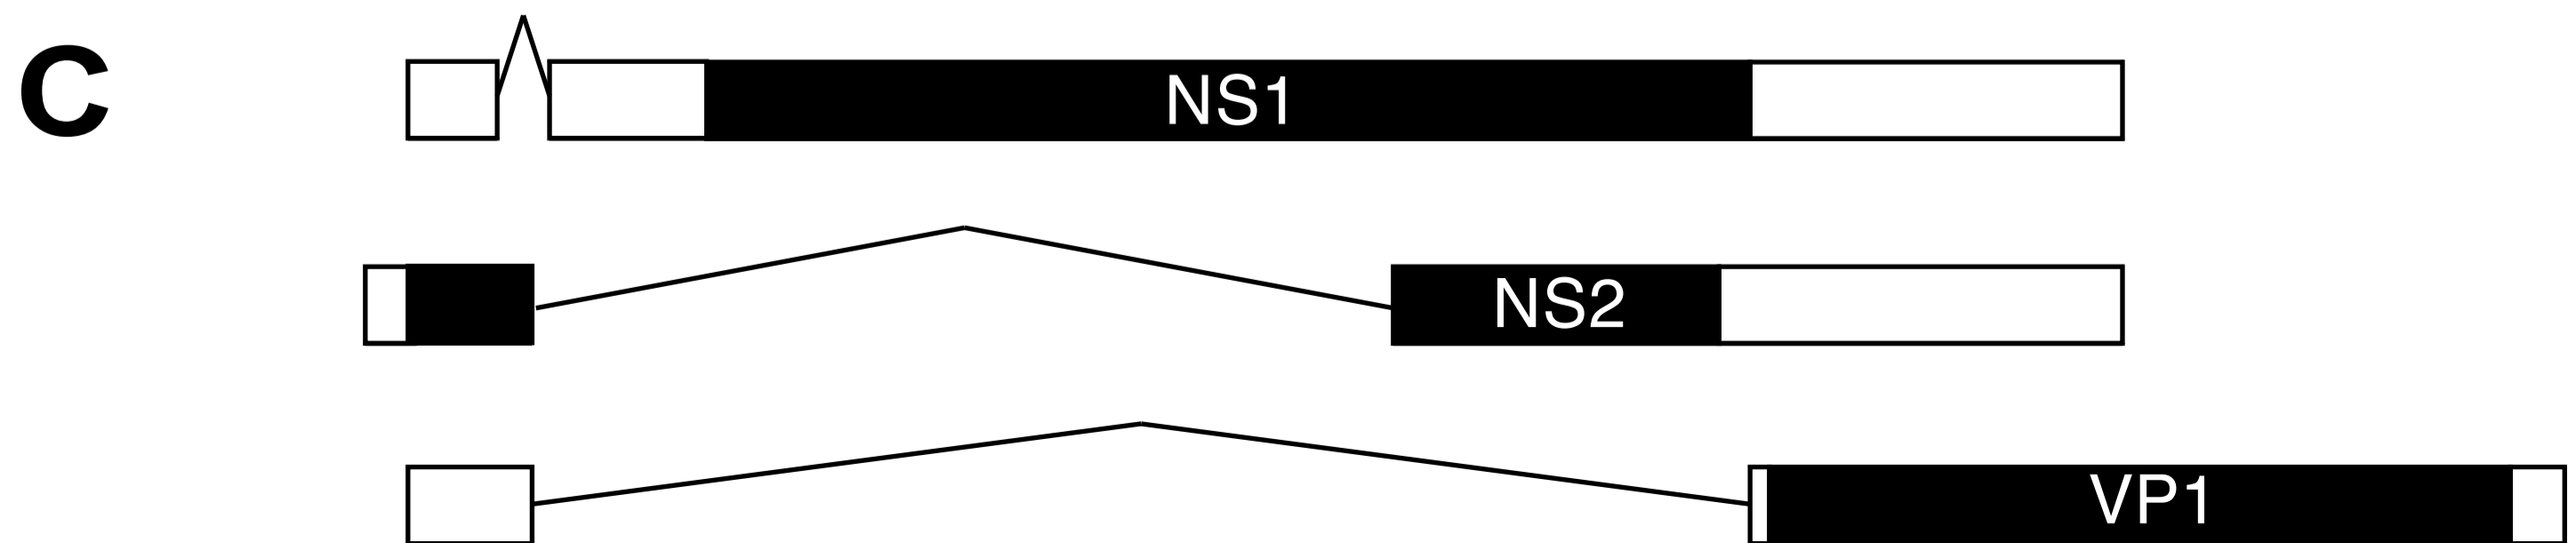

Supplement: NIHMS1506358-supplement-2.pdf [file NIHMS1506358-supplement-2.pdf]

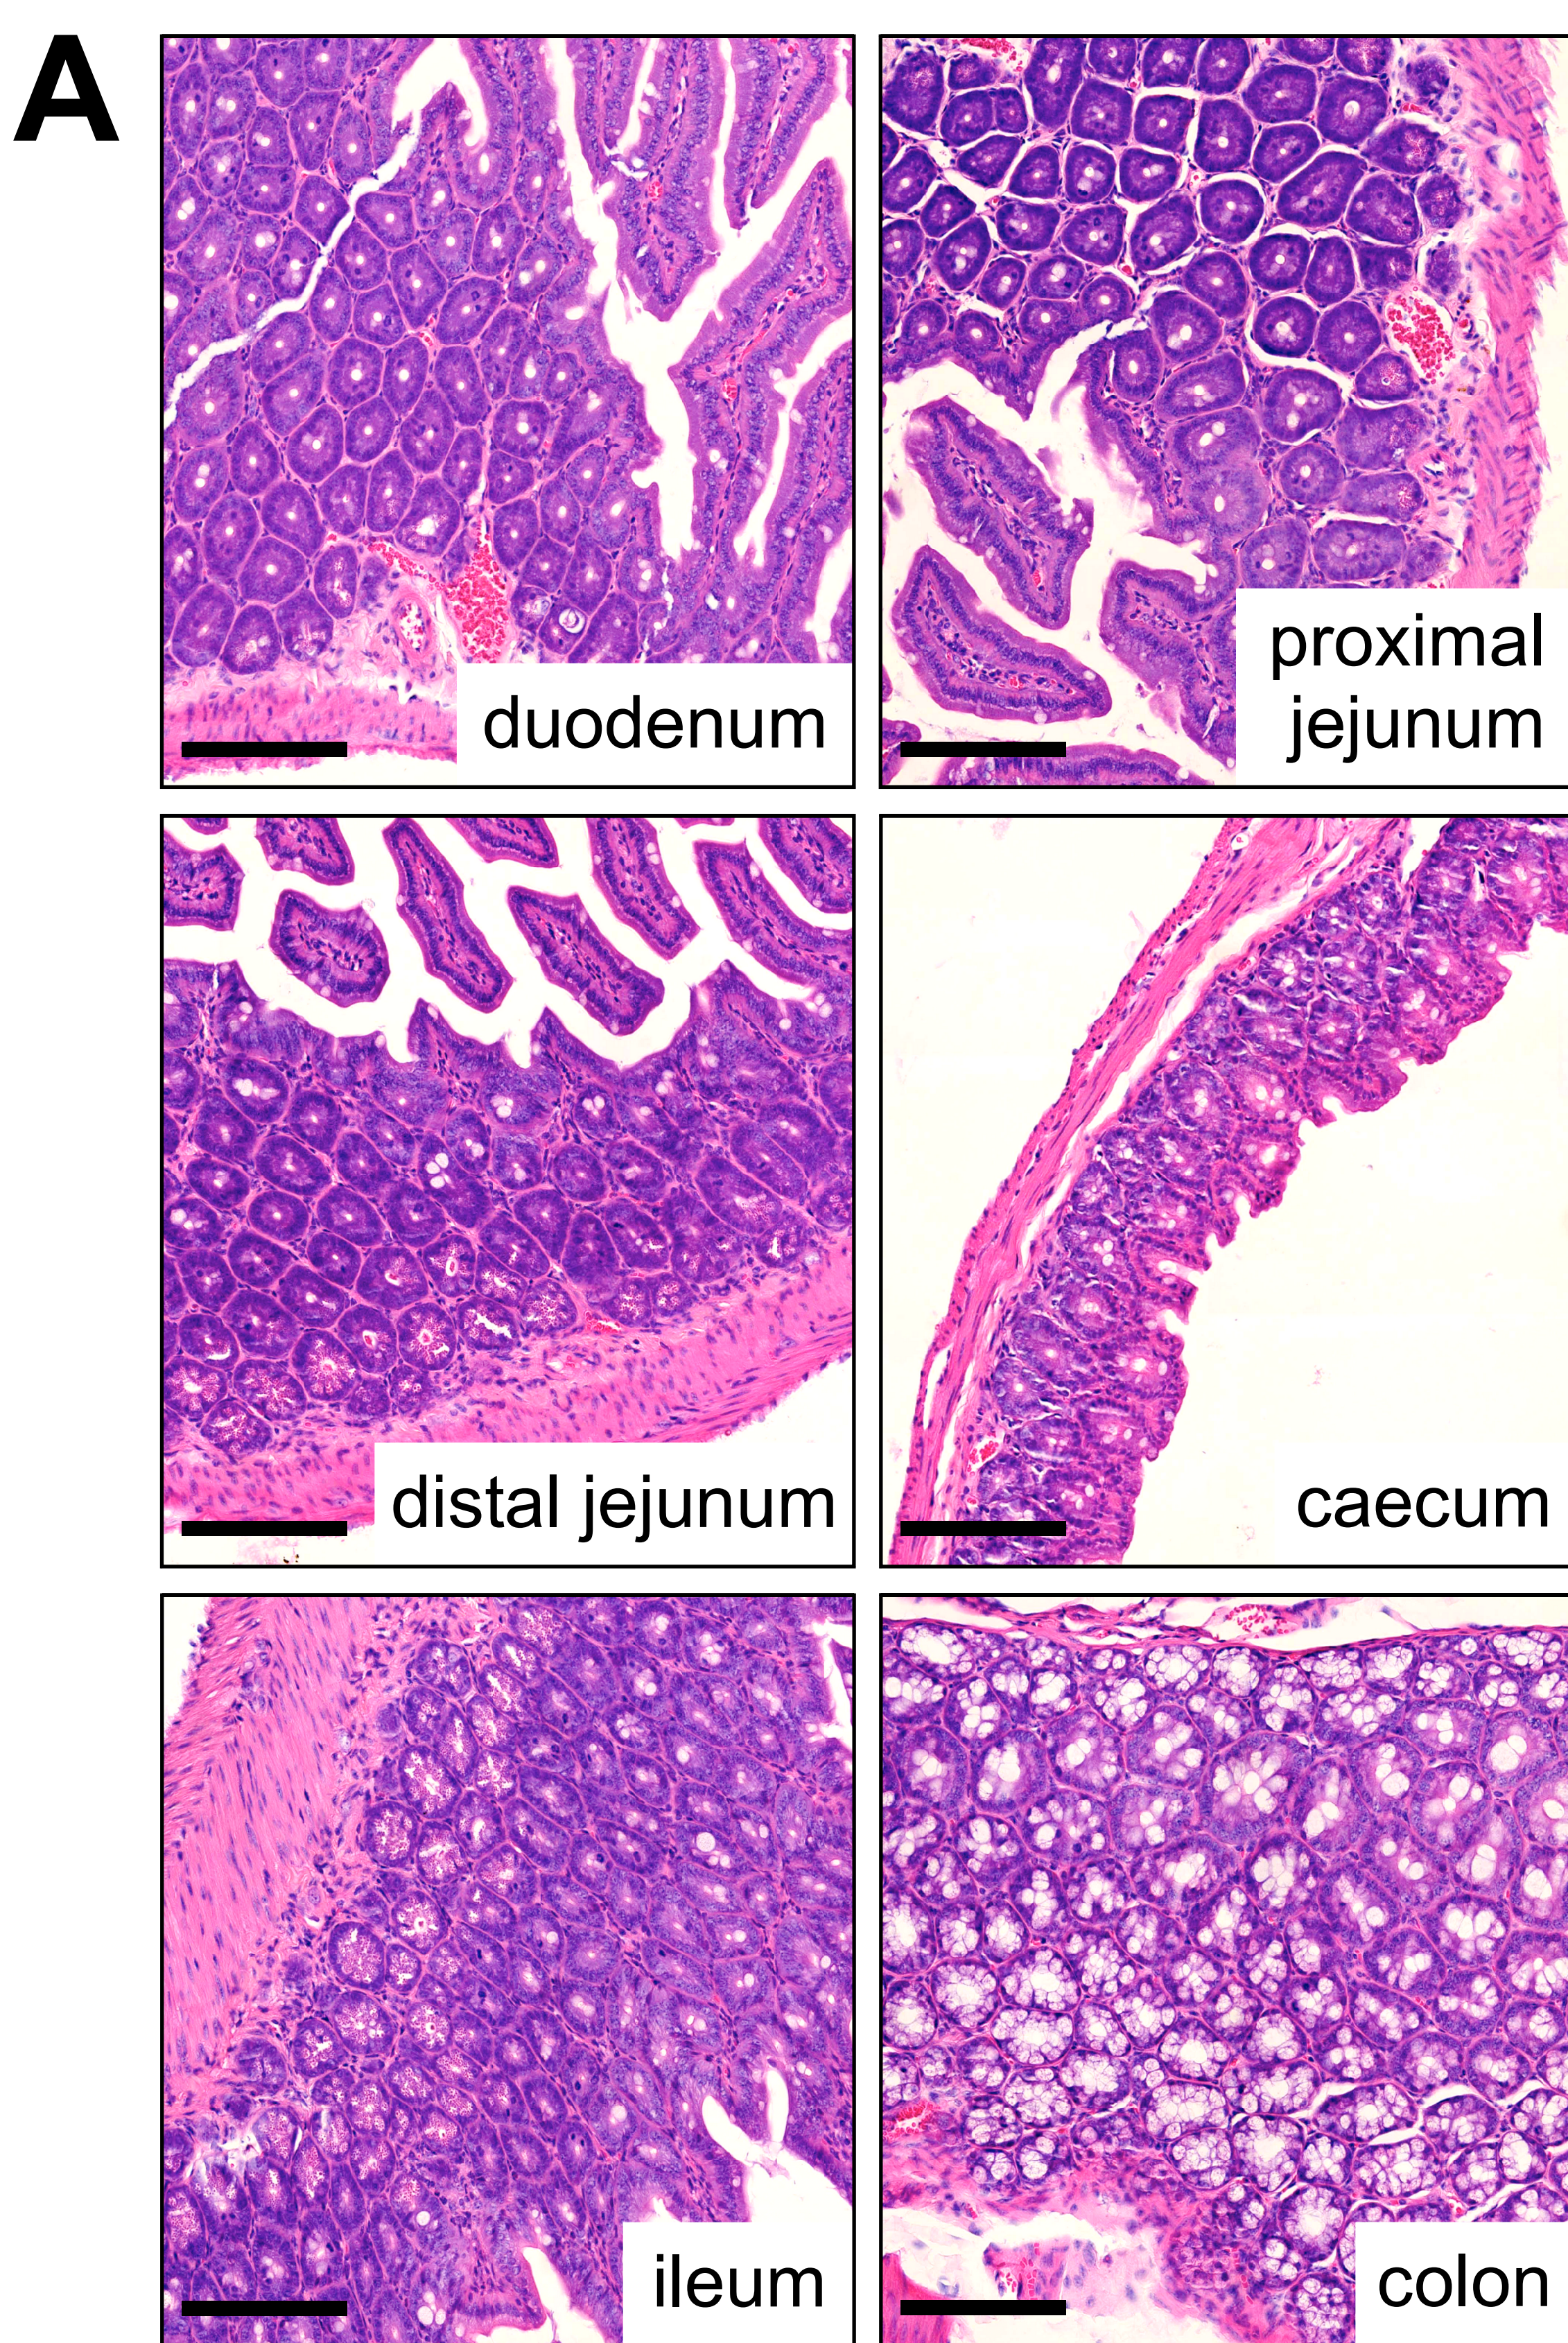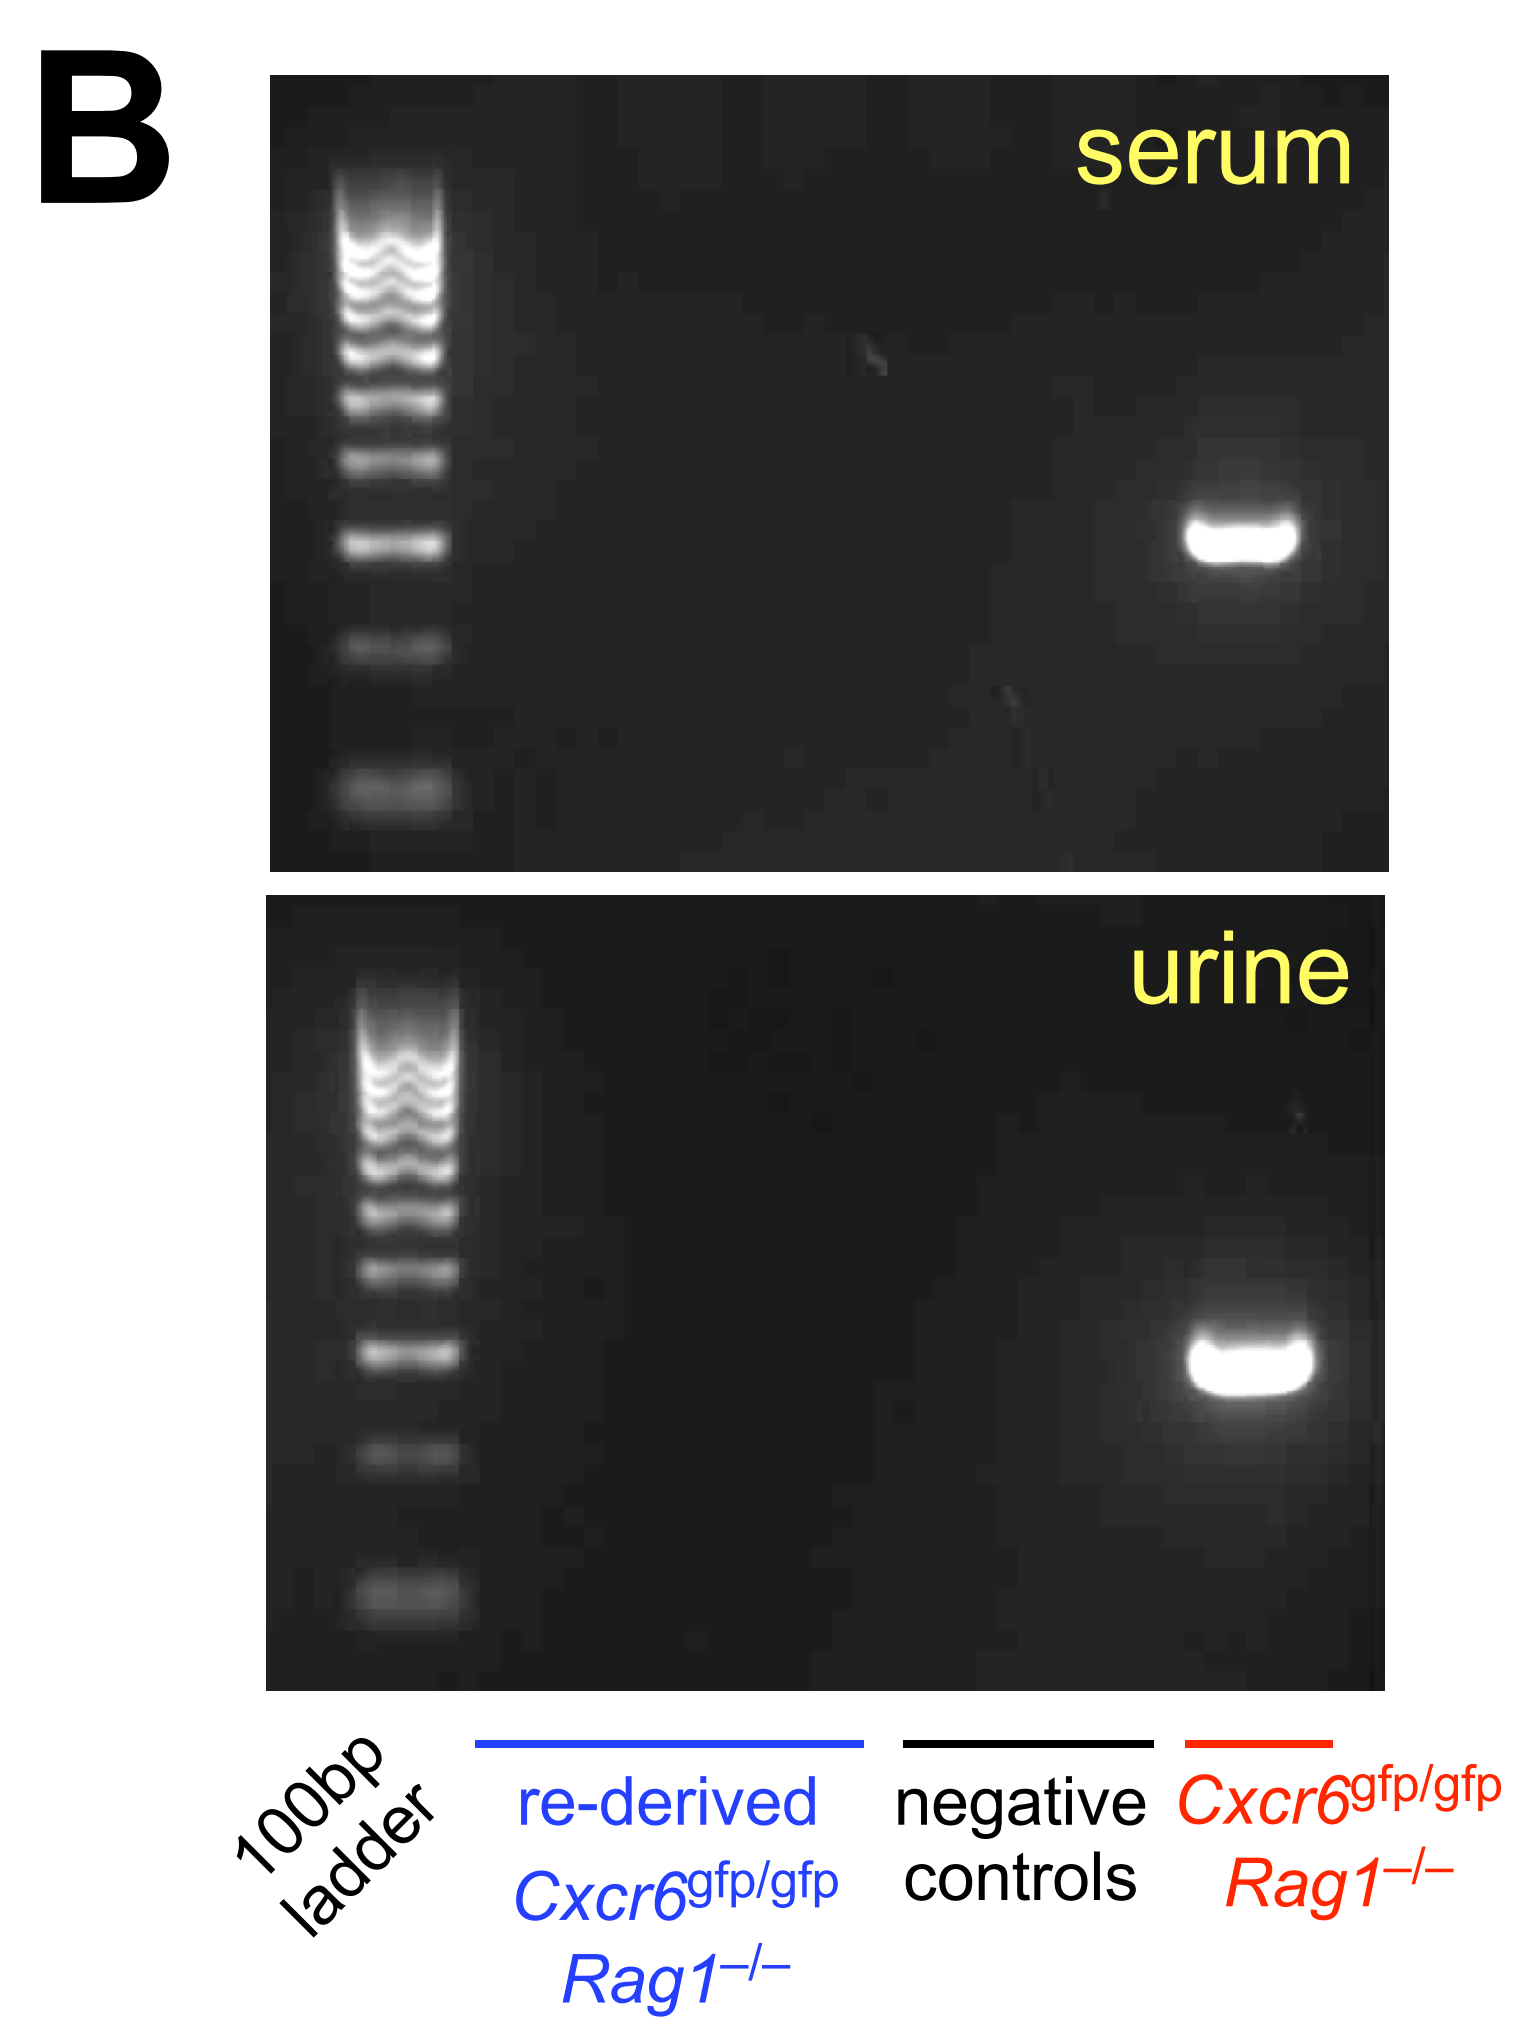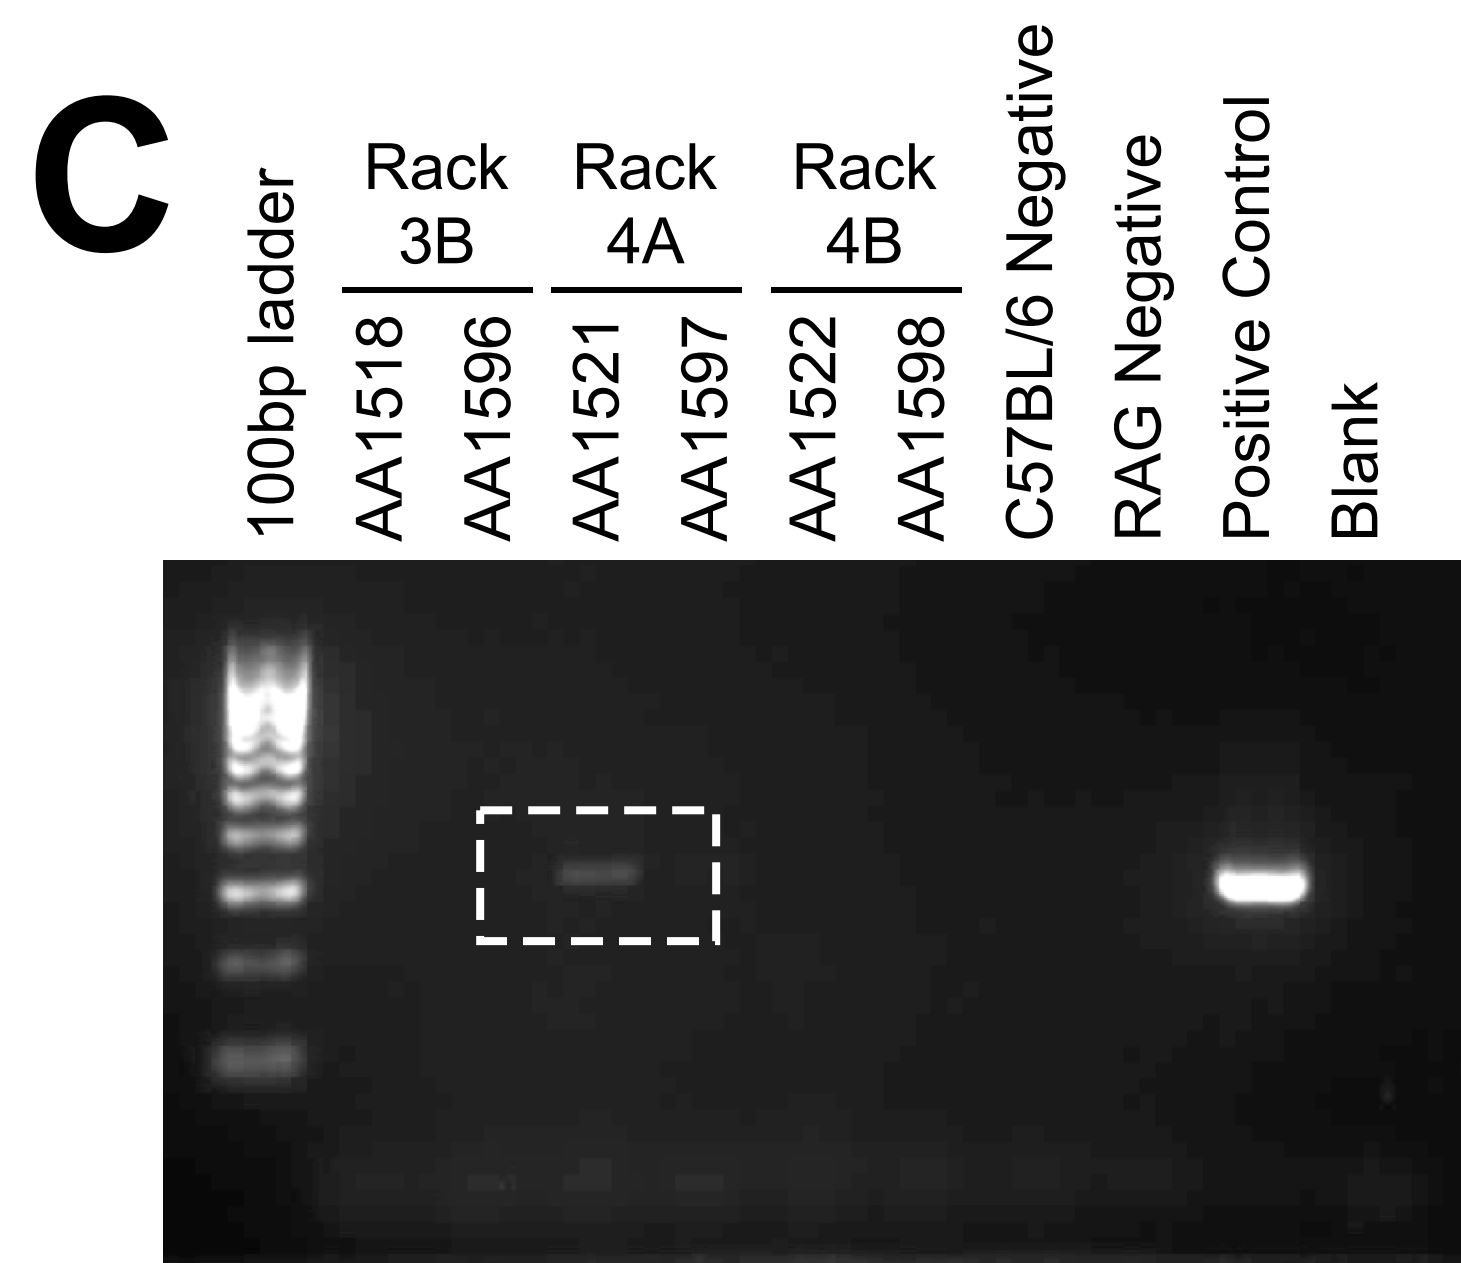

**D** MKPV VP1 mRNA

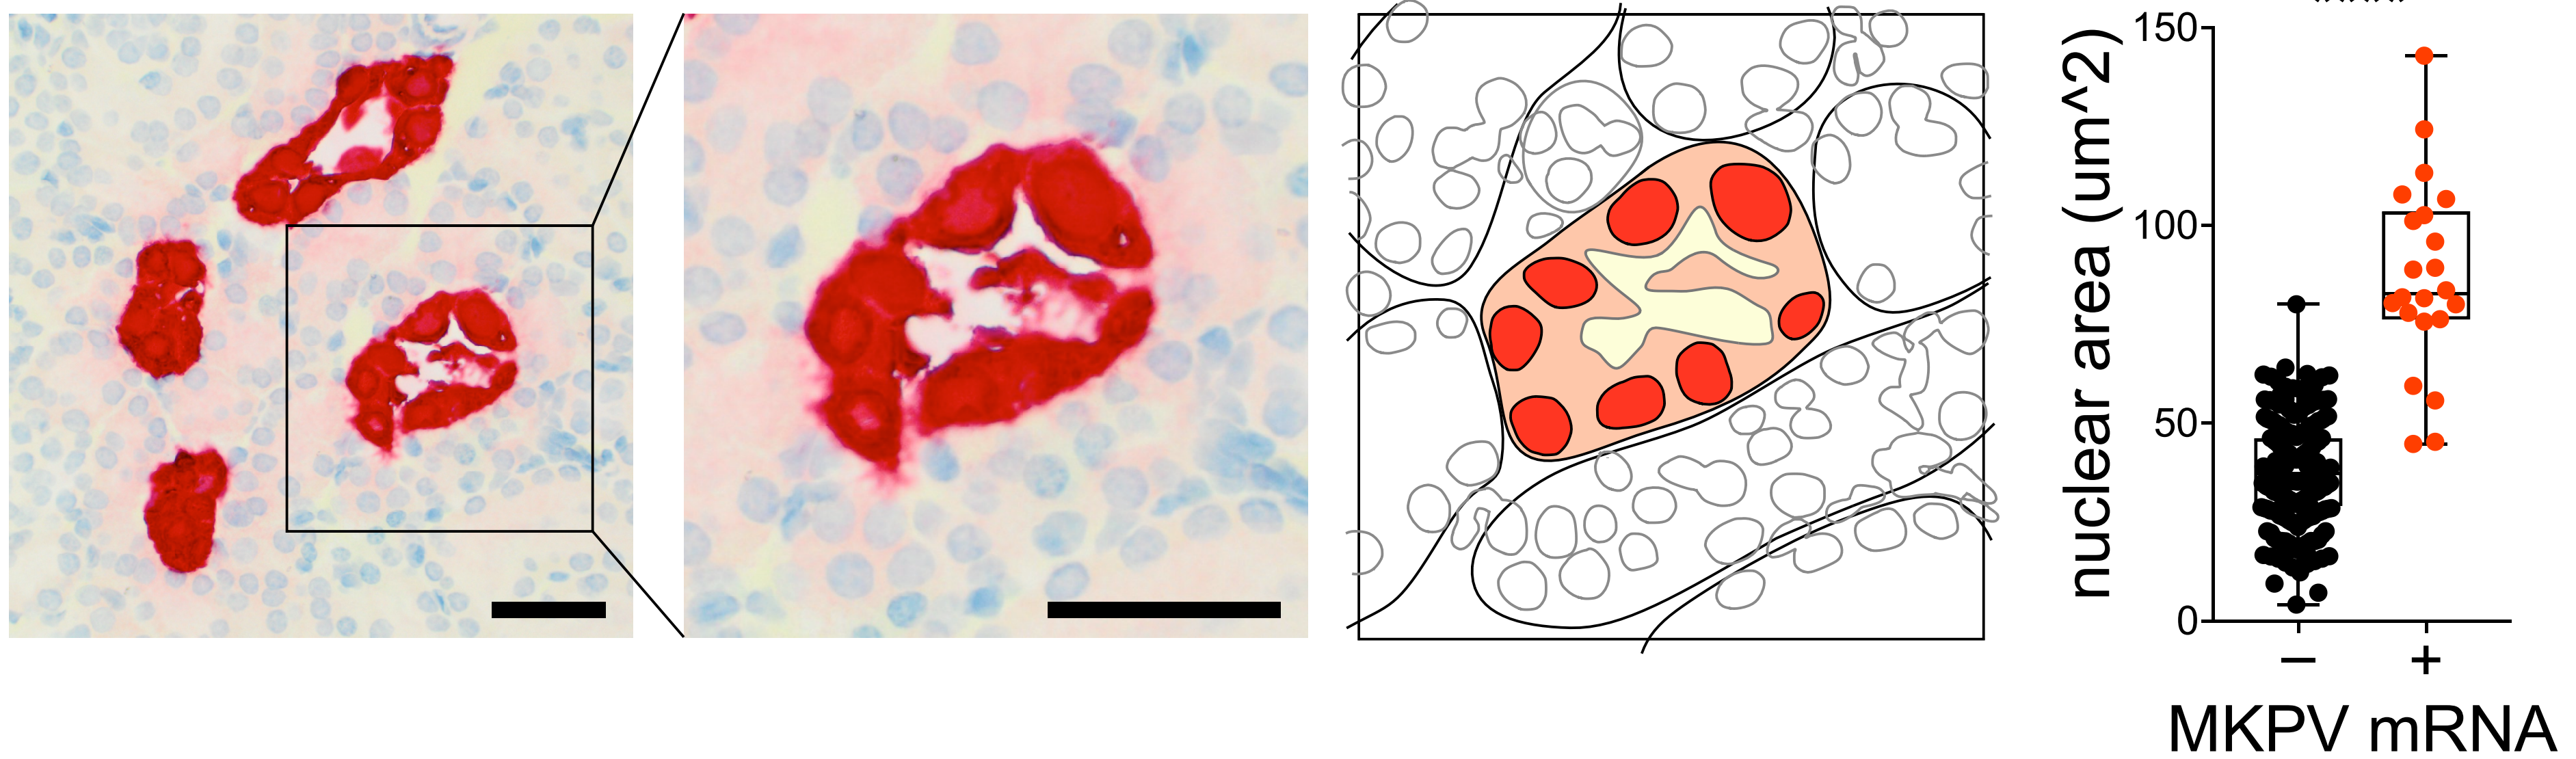

Supplement: NIHMS1506358-supplement-3.pdf [file NIHMS1506358-supplement-3.pdf]

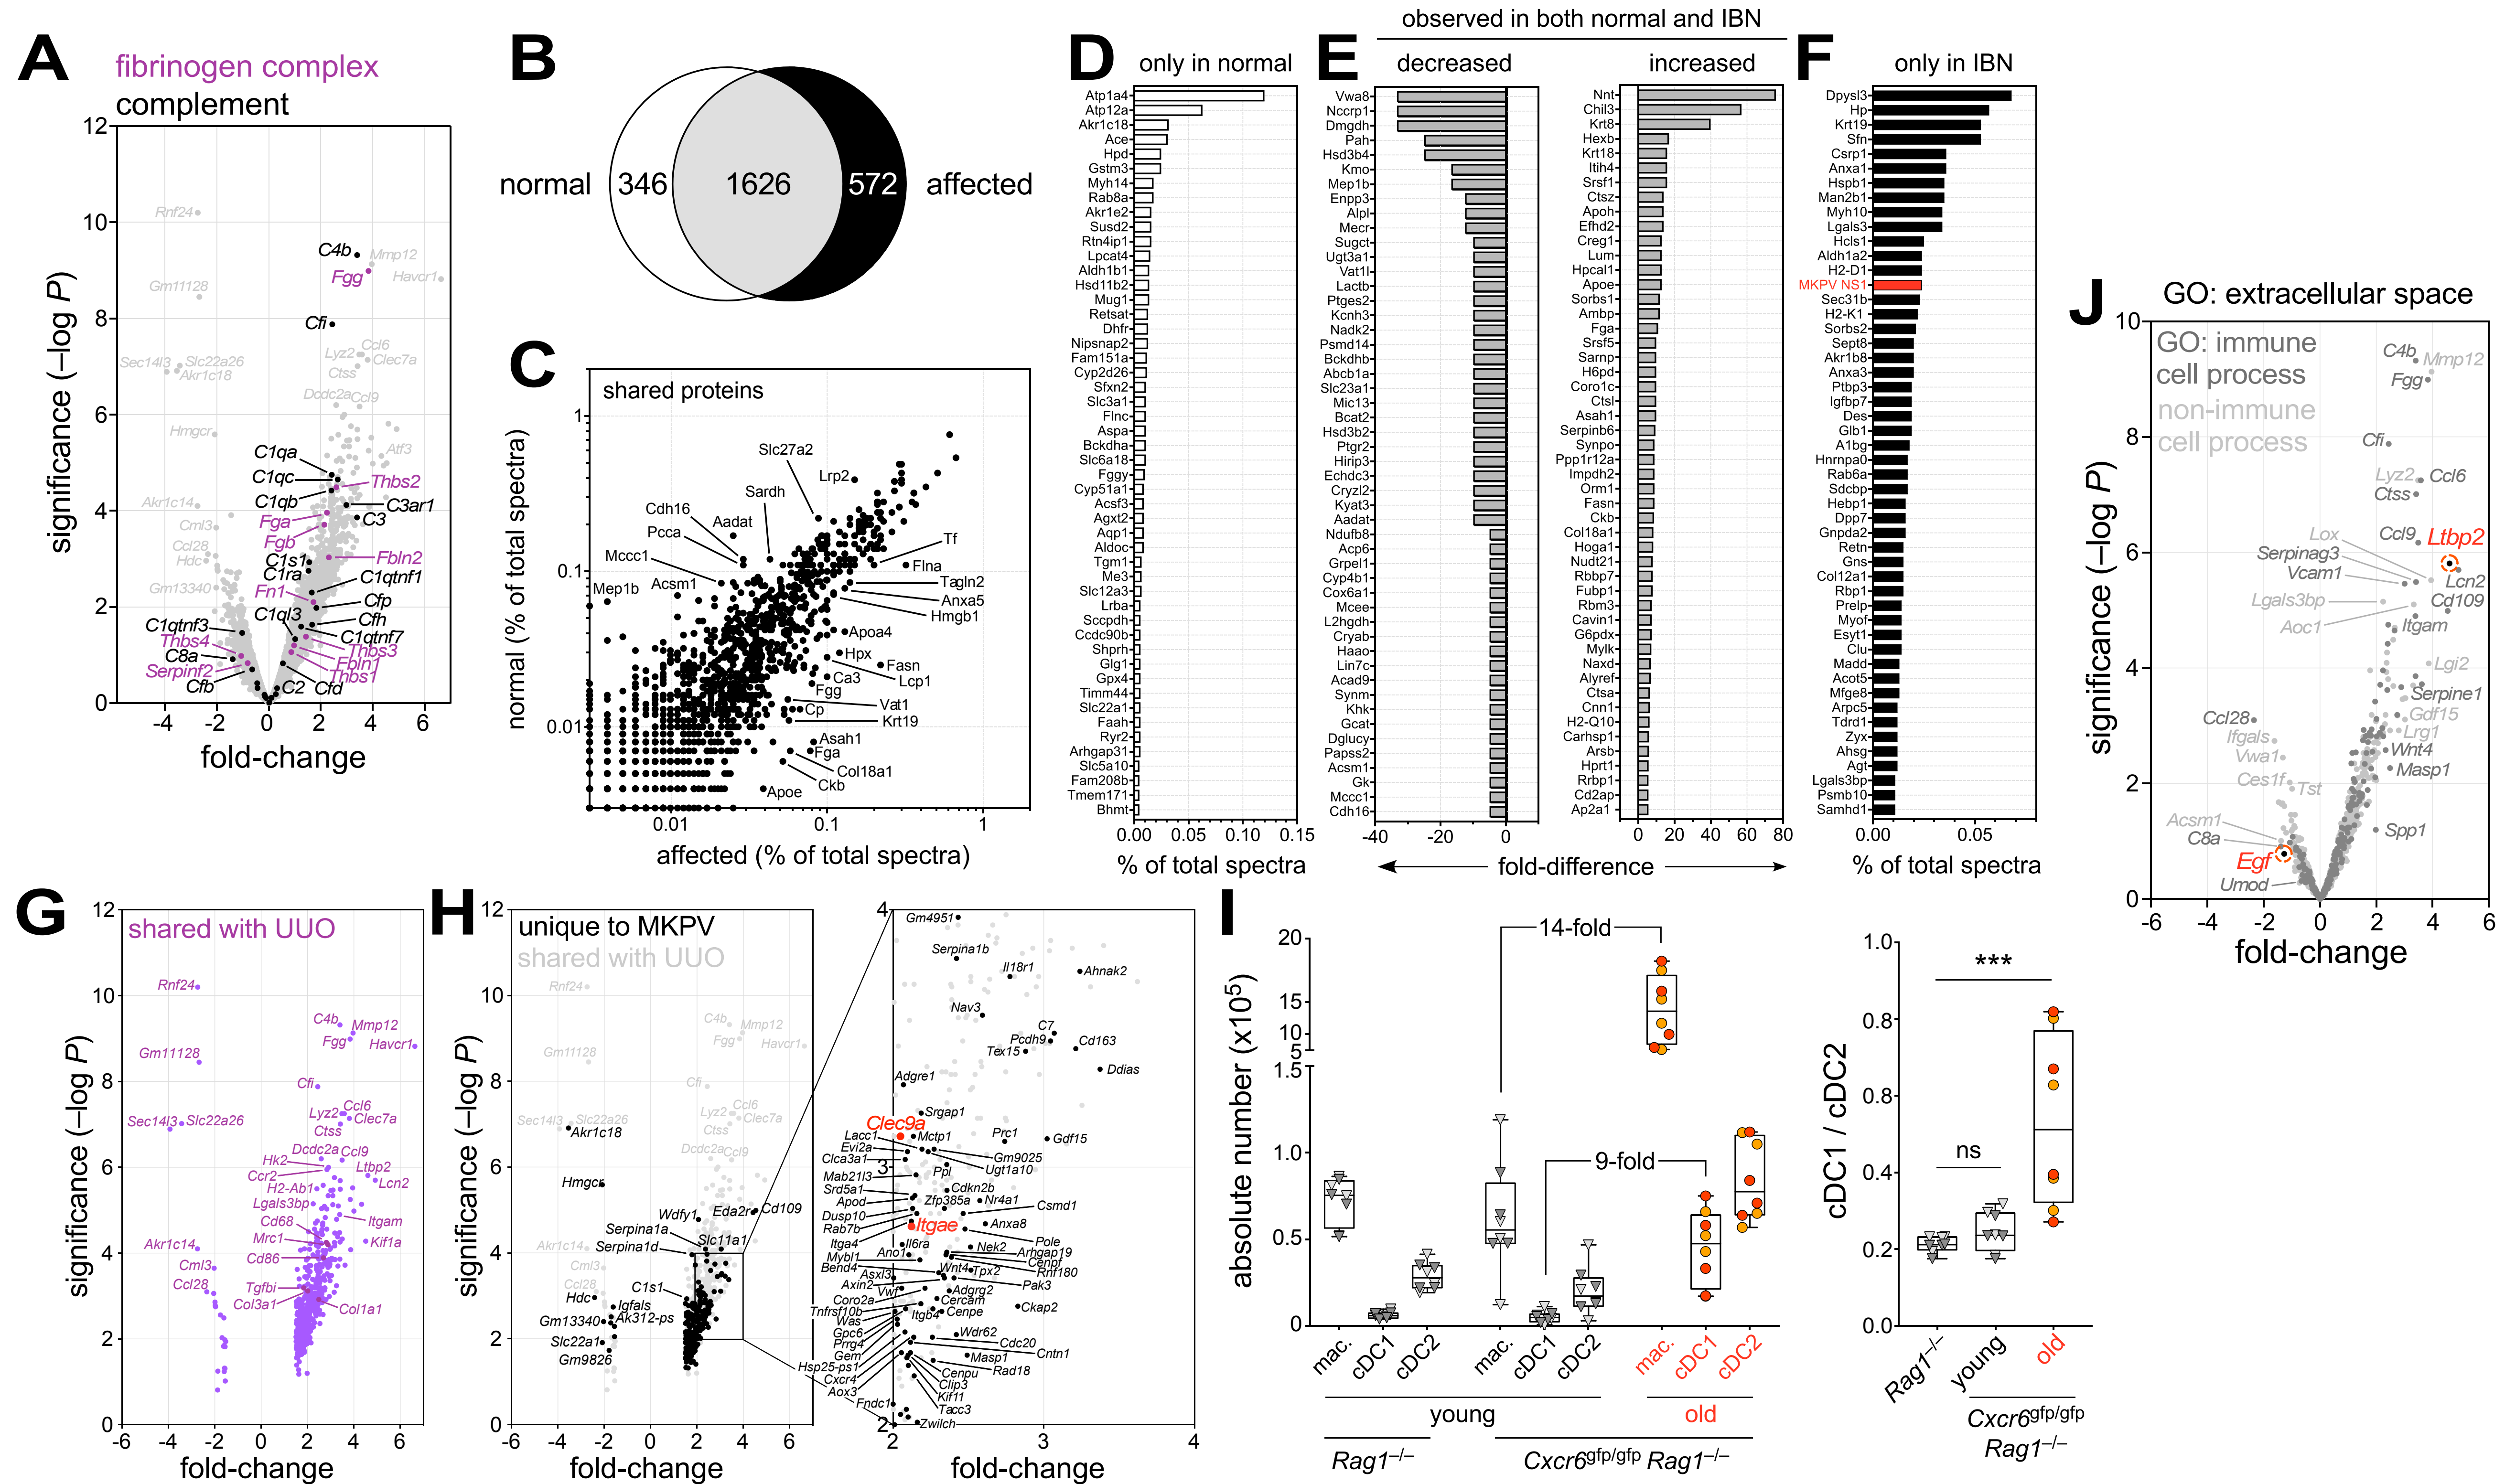

Supplement: NIHMS1506358-supplement-7.pdf [file NIHMS1506358-supplement-7.pdf]
